# Supplementary material for: Long-Interval Intracortical Inhibition and the Cortical Silent Period in Youth
Source: MDPI journal article supplement (doi:10.3390/biomedicines11020409), 2023-01-30
Supplement: s1 [file s1]

Supplementary Materials:

*“Long-Interval Intracortical Inhibition and the Cortical Silent Period in Youth”*

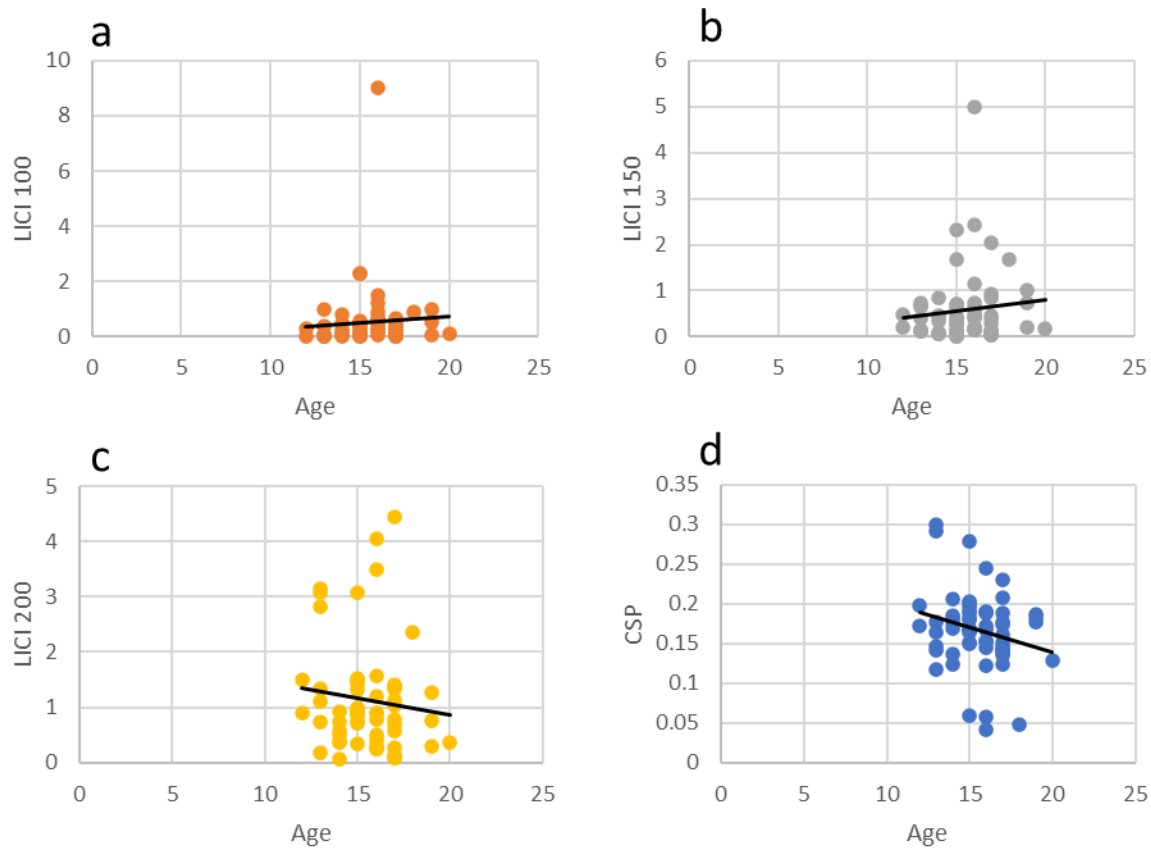

**Figure S1** Relationship between age with Long-Interval Intracortical Inhibition (LICI) and Cortical Silent Period (CSP). Scatter plots of age with LICI **a)** 100 ms ISI; **b)** 150 ms ISI; **c)** 200 ms ISI and **d)** CSP paradigms.

**Table S1** Association between age with cortical silent period and long-interval intracortical inhibition in youth

| Total Sample (n= 61) |                 |           |
|----------------------|-----------------|-----------|
|                      | Spearman $\rho$ | $p$ Value |
| LICI                 |                 |           |
| 100 ms               | 0.1992          | 0.12      |
| 150 ms               | 0.0763          | 0.55      |
| 200 ms               | -0.1347         | 0.3       |
| CSP                  | -0.1794         | 0.16      |
